# Supplementary material
Source: PubMed Central journal article supplement (PMC4399034)
Supplement: IAI.03030-14_zii999091221so2.pdf [file IAI.03030-14_zii999091221so2.pdf]

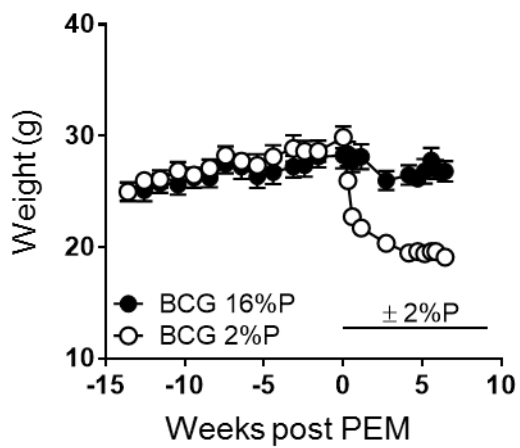

**Figure S2. Feeding of mice with the 2%P diet results in weight loss.** Groups of mice previously vaccinated with BCG (circles) or saline (diamonds) were infected with *M.tb.* via the aerosol route and subsequently fed 2%P (open symbols) or 16%P (closed symbols) diet. Groups of mice were routinely weighed one to two times per week. Data depicted as mean  $\pm$  SEM, n= 4-18 mice per time-point per group.
